# Supplementary material for: Science-based pathogen treatment requirements for direct potable reuse
Source: Royal Society of Chemistry journal article supplement (doi:10.1039/d3ew00362k), 2023-01-01
Supplement: d3ew00362k1.pdf [file d3ew00362k1.pdf]

## Electronic Supplementary Information

Figure ESI-1 and Figure ESI-2 show that 4-logs of redundancy would be sufficient to protect DPR systems against large magnitude failures for both enteric virus and *Giardia* while achieving the  $2.7 \times 10^{-7}$  daily risk goal 99% of the time and the  $10^{-4}$  annual risk goal >99% of the time.

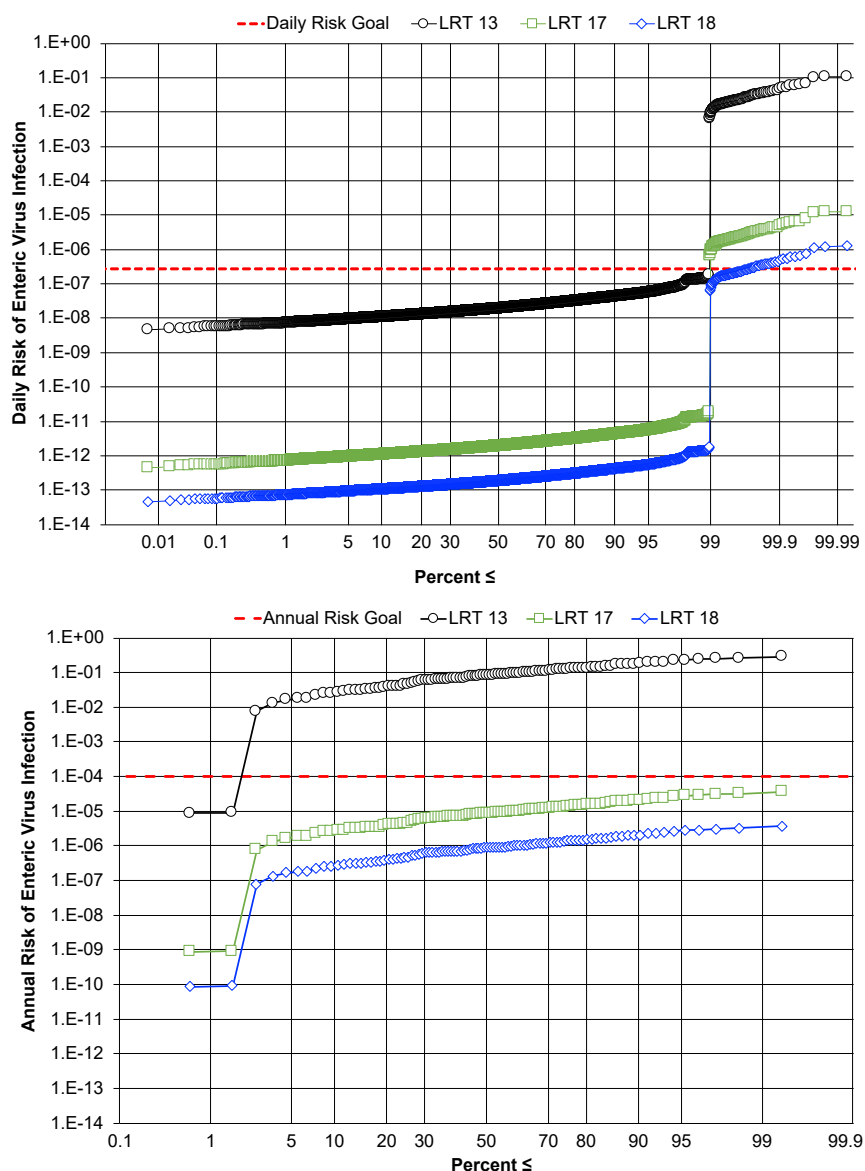

**Figure ESI-1.** Compliance with daily (top) and annual (bottom) risk goals for enteric virus based on a minimum treatment goal of 13 logs in addition to redundant treatment of 4-logs (17 logs total) and 5-log (18 logs total). X-axis denotes the probability of achieving a level of risk equal to or less than the value on the Y-axis.

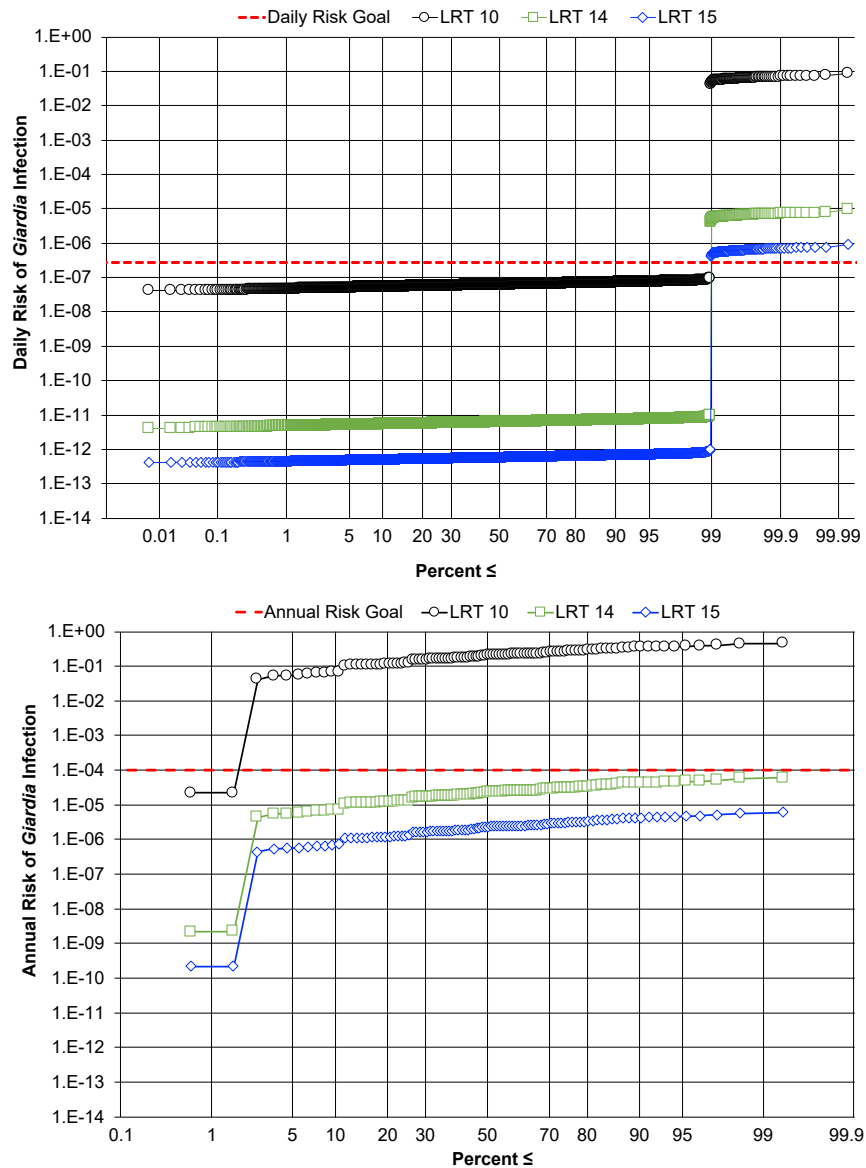

**Figure ESI-2.** Compliance with daily (top) and annual (bottom) risk goals for *Giardia* based on a minimum treatment goal of 10 logs in addition to redundant treatment of 4-logs (14 logs total) and 5-log (15 logs total). X-axis denotes the probability of achieving a level of risk equal to or less than the value on the Y-axis.
